# Supplementary material for: An unprecedented up-field shift in the 13C NMR spectrum of the carboxyl carbons of the lantern-type dinuclear complex TBA[Ru2(O2CCH3)4Cl2] (TBA+ = tetra(n-butyl)ammonium cation)
Source: Royal Society of Chemistry journal article supplement (doi:10.1039/c5dt01680k), 2015-01-01
Supplement: c5dt01680k1.pdf [file c5dt01680k1.pdf]

## Supporting Information

An Unprecedented Up-Field Shift in  $^{13}\text{C}$  NMR Spectrum for Carboxyl Carbon of Lantern-Type Dinuclear Complex  $\text{TBA}[\text{Ru}_2(\text{O}_2\text{CCH}_3)_4\text{Cl}_2]$  ( $\text{TBA}^+$  = Tetra(n-butyl)ammonium Cation)  
Yuya Hiraoka,<sup>a</sup> Takahisa Ikeue,<sup>\*a</sup> Hiroshi Sakiyama,<sup>b</sup> Frederic Guegan,<sup>c</sup> Dominique Luneau,<sup>c</sup> Gillon Beatrice,<sup>d</sup> Ichiro Hiromitsu,<sup>e</sup> Daisuke Yoshioka,<sup>f</sup> Masahiro Mikuriya,<sup>\*f</sup> Yusuke Kataoka<sup>a</sup> and Makoto Handa<sup>\*a</sup>

<sup>a</sup> Department of Chemistry, Interdisciplinary Graduate School of Science and Engineering, Shimane University, 1060 Nishikawatsu, Matsue 690-8504, Japan

E-mail: handami@riko-shimane-u.ac.jp

<sup>b</sup> Department of Material and Biological Chemistry, Faculty of Science, Yamagata University, 1-4-12 Kojirakawa, Yamagata 990-8560, Japan

<sup>c</sup> Laboratoire des Multimatériaux et Interfaces (UMR 5615), Université Claude Beernard Lyon 1, Campus de La Doua, 69622 Villeurbanne Cedex, France

<sup>d</sup> Laboratoire Léon Brillouin CEA/CNRS, UMR0012, Centre d'Etudes de Saclay, 91191, Gif sur Yvette, France

<sup>e</sup> Department of Physics and Materials Science, Interdisciplinary Graduate School of Science and Engineering, Shimane University, 1060 Nishikawatsu, Matsue 690-8504

<sup>f</sup> Department of <sup>b</sup>Chemistry and Research Center for Coordination Molecule-based Devices, School of Science and Technology, Kwansai Gakuin University, 2-1 Gakuen, Sanda 669-1337, Japan.

## Experimental Section

### Synthesis of **1**

$\text{Ru}_2(\text{O}_2\text{CCH}_3)_4\text{Cl}$  (200 mg, 0.4 mmol) and 0.4mmol TBACl (Tetra(*n*-butyl)ammonium chloride, ca.120mg) were stirred in  $\text{CH}_2\text{Cl}_2$ . After several hours this solution became clear. To this solution added hexane, and then the precipitate was collected by suction. The yield was 290mg (93% based on  $\text{Ru}_2(\text{O}_2\text{CCH}_3)_4\text{Cl}$ ). Anal. Calc. for  $\text{C}_{24}\text{H}_{48}\text{Cl}_2\text{NO}_8\text{Ru}_2$  : C, 38.35; H, 6.44; N, 1.86. Found: C, 38.31; H, 6.04; N, 2.00. IR(KBr,  $\text{cm}^{-1}$ ) =3541(w), 3461(w), 2961(w), 2875(w), 1437(vs), 1347(w), 688(s)

$^1\text{H}$  NMR (500MHz,  $\text{CD}_2\text{Cl}_2$ , 25°C)  $\delta$  0.4 (s, 12H,  $\text{TBA}^+$ ), -0.7 (s, 8H,  $\text{TBA}^+$ ), -2.8 (s, 8H,  $\text{TBA}^+$ ), -3.5 (s, 8H,  $\text{TBA}^+$ ), -42.6 (s, 12H,  $\text{CH}_3$ ).

$^{13}\text{C}$  NMR (125MHz,  $\text{CD}_2\text{Cl}_2$ , 25°C)  $\delta$  56.9 (t,  $J=144\text{Hz}$ ,  $\text{TBA}^+$ ), 20.0 (t,  $J=131\text{Hz}$ ,  $\text{TBA}^+$ ), 17.5 (t,  $J=126\text{Hz}$ ,  $\text{TBA}^+$ ), 12.4 (q,  $J=126\text{Hz}$ ,  $\text{TBA}^+$ ), -140 (q,  $J=126\text{Hz}$ ,  $\text{CH}_3$ ), -763 (s,  $\text{CO}_2$ ).

### Evaluation of contact shift ( $\delta_{\text{contact}}$ )

The  $\delta_{\text{contact}}$  values were evaluated by using the following equation (see ref. 22):

$$\delta_{\text{contact}} = m(S+1)\rho_{\text{cf}}/T$$

where  $S$  ( $=3/2$ ) is the spin state,  $\rho_{\text{cf}}$  is Fermi contact spin density at the nucleus of interest (DFT calculation of **1** afforded  $\rho_{\text{cf}}$ (in au) =  $-4.715 \times 10^{-3}$  (per carboxyl carbon) and  $-1.000 \times 10^{-3}$  (per methyl carbon)),  $T$  is the absolute temperature (298.15 K), and  $m$  is a collection of physical constants:

$$m = (\mu_0\mu_{\text{B}}^2g_e^2)/9k = 23.5 \times 10^6 \text{ ppm K au}^{-1}$$

Table S1. Crystal and experimental data for **1**·CH<sub>2</sub>Cl<sub>2</sub>

---

Chemical formula : C<sub>26</sub>H<sub>52</sub>Cl<sub>6</sub>NO<sub>8</sub>Ru<sub>2</sub>

Formula weight = 921.53

*T* = 90(2)K

Crystal system : triclinic

Space group :  $P\bar{1}$

*a* = 11.9262(14) Å

$\alpha$  = 76.860(2)°

*b* = 12.4678(15) Å

$\beta$  = 82.601(2)°

*c* = 13.3115(16) Å

$\gamma$  = 86.546(2)°

*V* = 1910.5(4) Å<sup>3</sup>

*Z* = 2

*D*<sub>x</sub> = 1.602 g/cm<sup>3</sup>

Radiation : Mo K $\alpha$  ( $\lambda$  = 0.71073)

$\mu$  ( Mo K $\alpha$ ) = 1.252mm<sup>-1</sup>

*F*(000) = 938

Crystal size = 0.60 x 0.53 x 0.30 mm<sup>3</sup>

No. of reflections collected = 11700

No. of independent reflections = 8366

$\theta$  range for data collection : 1.58 to 28.31°.

Data / restraints / parameters : 8366 / 0 / 438

Goodness-of-fit on *F*<sup>2</sup> = 1.074

*R* indices [*I* > 2 $\sigma$ (*I*)] : *R*1 = 0.0313, *wR*2 = 0.0838

*R* indices (all data) : *R*1 = 0.0368, *wR*2 = 0.0859

( $\Delta/\sigma$ )<sub>max</sub> = 0.002

( $\Delta\rho$ )<sub>max</sub> = 1.084 Å<sup>-3</sup>

( $\Delta\rho$ )<sub>min</sub> = -0.611 Å<sup>-3</sup>

Measurement: Bruker Smart APEX CCD diffractometer

Program system: SHELXTL

Structure determination: Direct methods (SHELXS-97)

Refinement: full: full matrix least-squares (SHELXL-97)

CCDC deposition number: 998328

---

Table S2. Selected bond Distances (Å) and Angles (°) of **1**

|                           |             |                            |            |
|---------------------------|-------------|----------------------------|------------|
| Ru1-Ru1A <sup>i</sup>     | 2.3019(4)   | Ru2-Ru2A <sup>ii</sup>     | 2.3006(5)  |
| Ru1-O1                    | 2.0288(17)  | Ru2-O5                     | 2.0297(18) |
| Ru1-O2                    | 2.0293(17)  | Ru2-O6                     | 2.0254(19) |
| Ru1-O3                    | 2.0306(16)  | Ru2-O7                     | 2.0322(18) |
| Ru1-O4                    | 2.0279(1)   | Ru2-O8                     | 2.0193(18) |
| Ru1-Cl1                   | 2.5316(6)   | Ru2-Cl2                    | 2.5181(7)  |
| O1-Ru1-O3                 | 88.74(7)    | O5-Ru2-O7                  | 89.36(7)   |
| O1-Ru1-O4                 | 90.80(7)    | O5-Ru2-O8                  | 90.70(8)   |
| O2-Ru1-O3                 | 90.98(7)    | O6-Ru2-O7                  | 90.00(7)   |
| O2-Ru1-O4                 | 89.42(7)    | O6-Ru2-O8                  | 89.89(7)   |
| Cl1-Ru1-Ru1A <sup>i</sup> | 176.540(18) | Cl2-Ru2-Ru2A <sup>ii</sup> | 176.55(2)  |

Symmetry codes : i) 2-x, -y, -z    ii) 1-x, 1-y, 1-z

Table S3. Theoretically and experimentally obtained redox potentials for  $\text{Ru}_2^{4+}/\text{Ru}_2^{5+}$  and  $\text{Ru}_2^{5+}/\text{Ru}_2^{6+}$  (V vs. SCE)

| Calculation models                                     | $E_{1/2}(\text{Ru}_2^{4+} / \text{Ru}_2^{5+})$ | $E_{1/2}(\text{Ru}_2^{5+} / \text{Ru}_2^{6+})$ |
|--------------------------------------------------------|------------------------------------------------|------------------------------------------------|
| $[\text{Ru}_2(\text{O}_2\text{CCH}_3)_4\text{Cl}_2]^-$ | -0.32                                          | 1.33                                           |
| $[\text{Ru}_2(\text{O}_2\text{CCH}_3)_4\text{Cl}]$     | 0.06                                           | 2.11                                           |
| $[\text{Ru}_2(\text{O}_2\text{CCH}_3)_4]^+$            | 0.76                                           | 3.14                                           |
| Experimental <sup>a)</sup>                             | -0.34                                          | 1.33                                           |

a) See text.

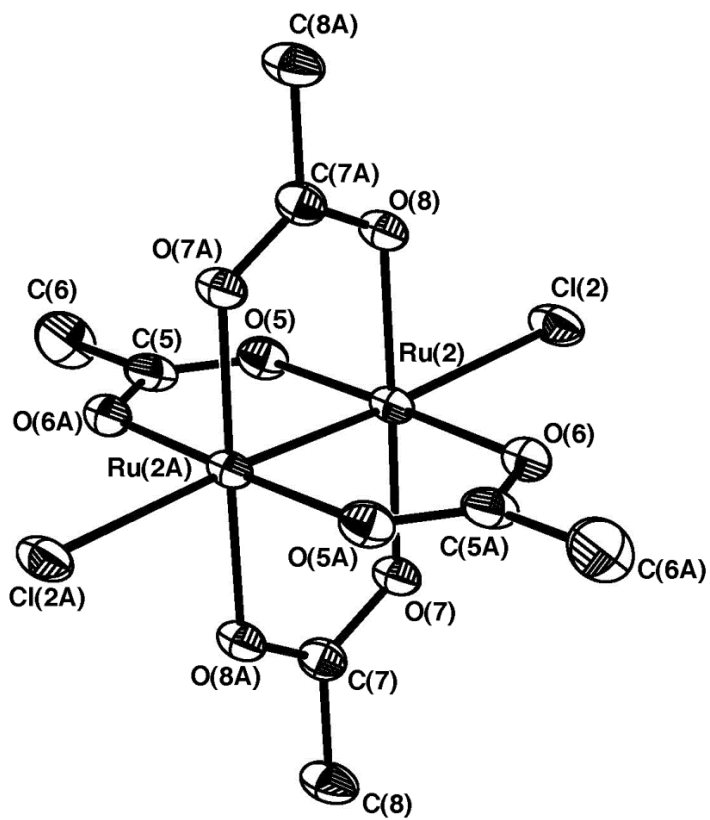

Fig. S1. ORTEP drawing of the Ru2-Ru2A dinuclear unit of **1**•2CH<sub>2</sub>Cl<sub>2</sub> showing the thermal ellipsoids at 25% probability level. Hydrogen atoms are omitted for clarity.

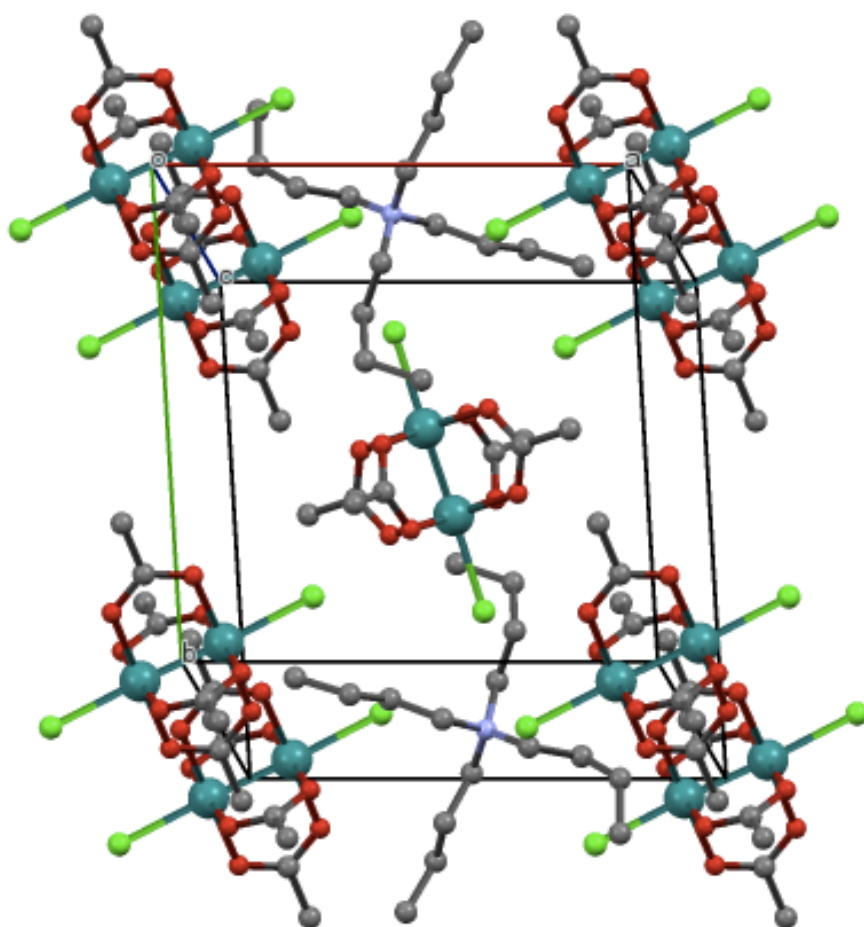

Fig. S2. Packing diagram of **1**. Hydrogen atoms and solvent molecules are omitted for clarity.

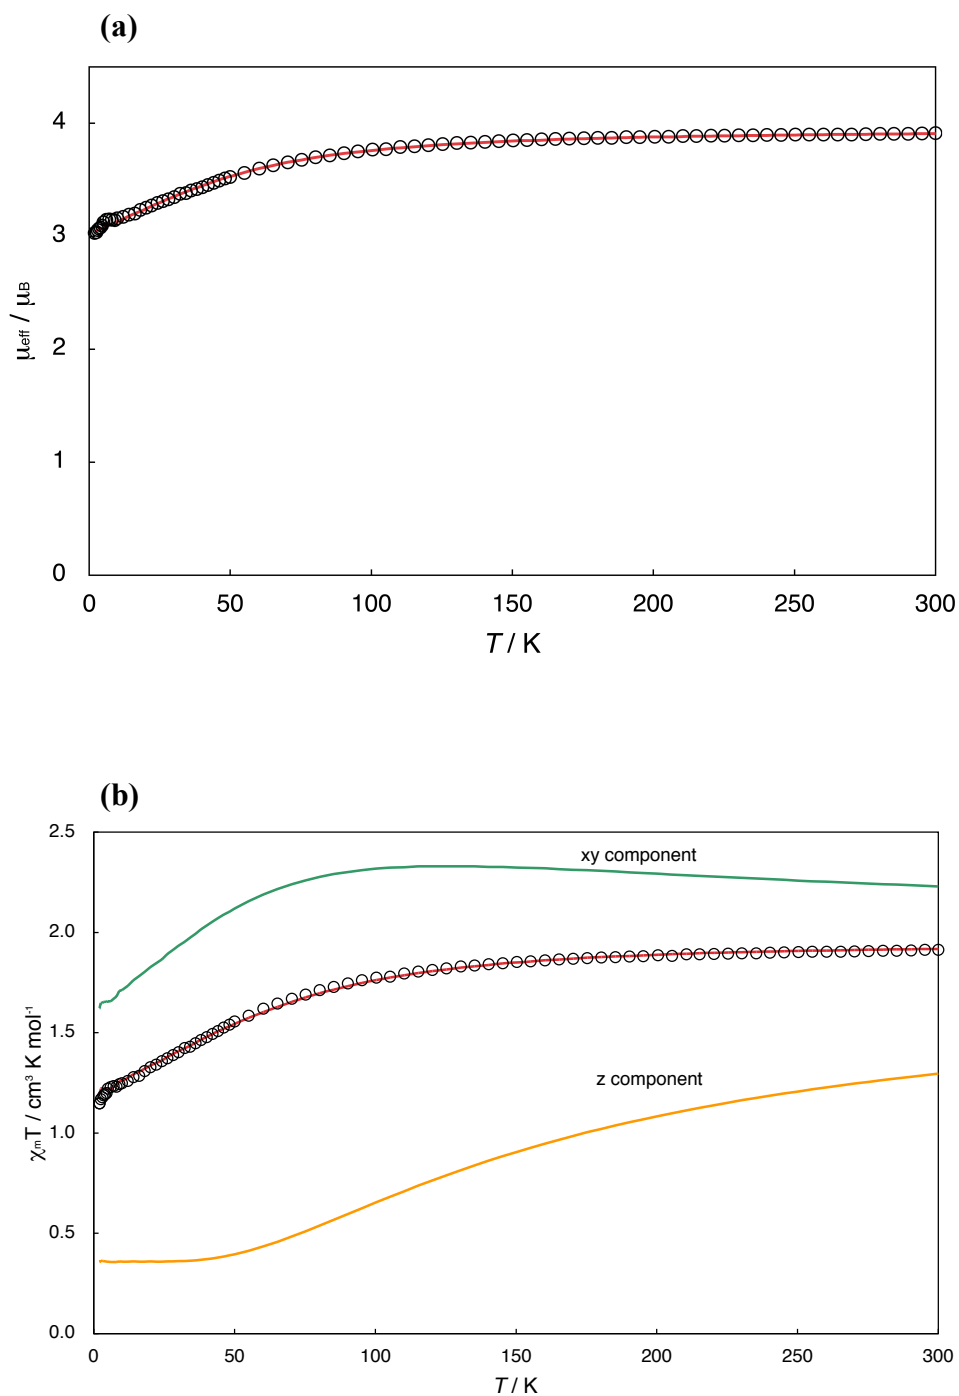

Fig. S3 Plots of  $\mu_{\text{eff}}$  versus  $T$  for **1**, red line being drawn with the parameter values described in the text [(a) top]. Plots of  $\chi_{\text{M}} T$  for **1**, solid lines being drawn with the parameter values described in the text [(b) bottom].



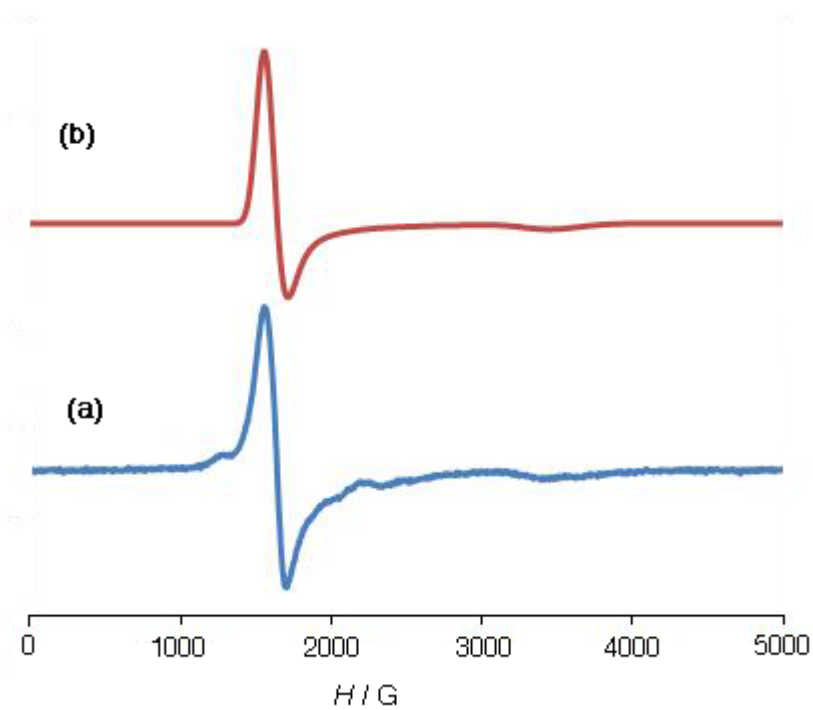

Fig. S4 EPR spectrum of **1** (a) in solid at 4K. The simulated spectrum (b) is drawn with the parameter values in the text. 1 G = 0.1 mT.

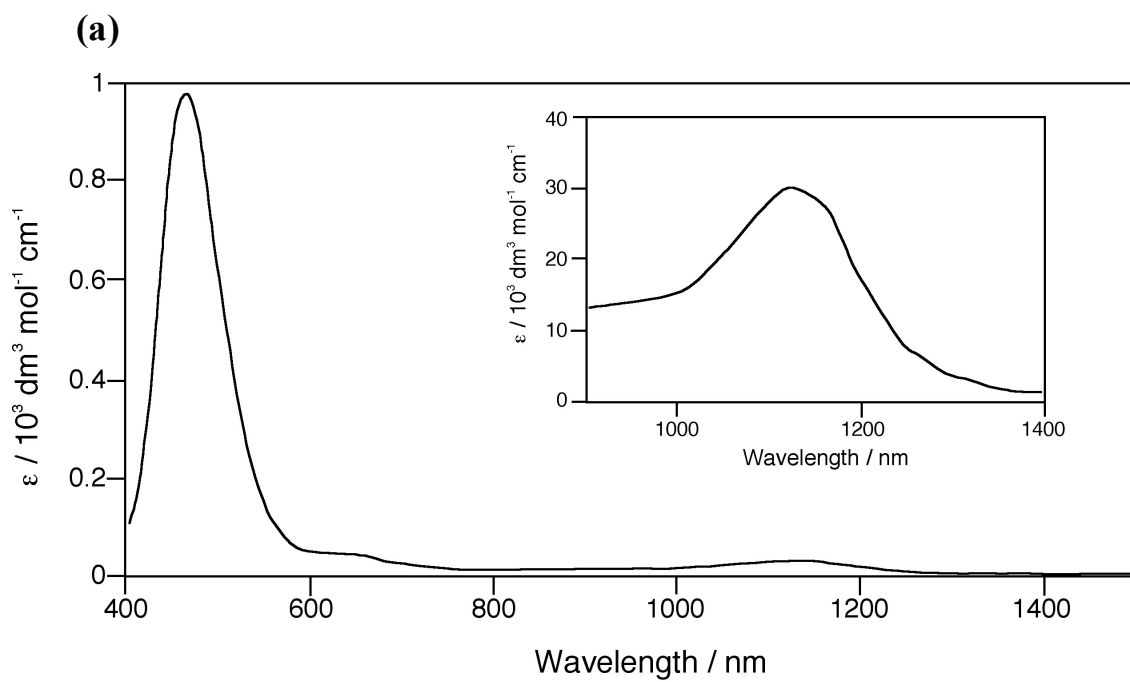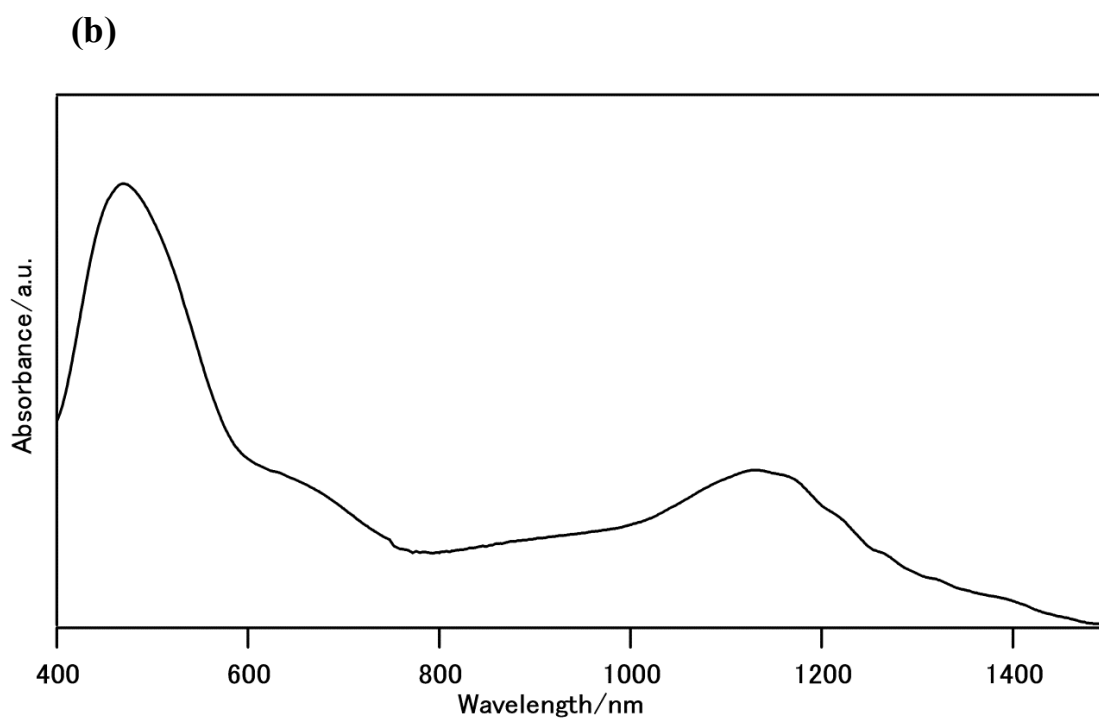

Fig. S5 Absorption spectrum of **1** in  $\text{CH}_2\text{Cl}_2$  [(a) top] and diffuse reflectance spectrum of **1** [(b) bottom].

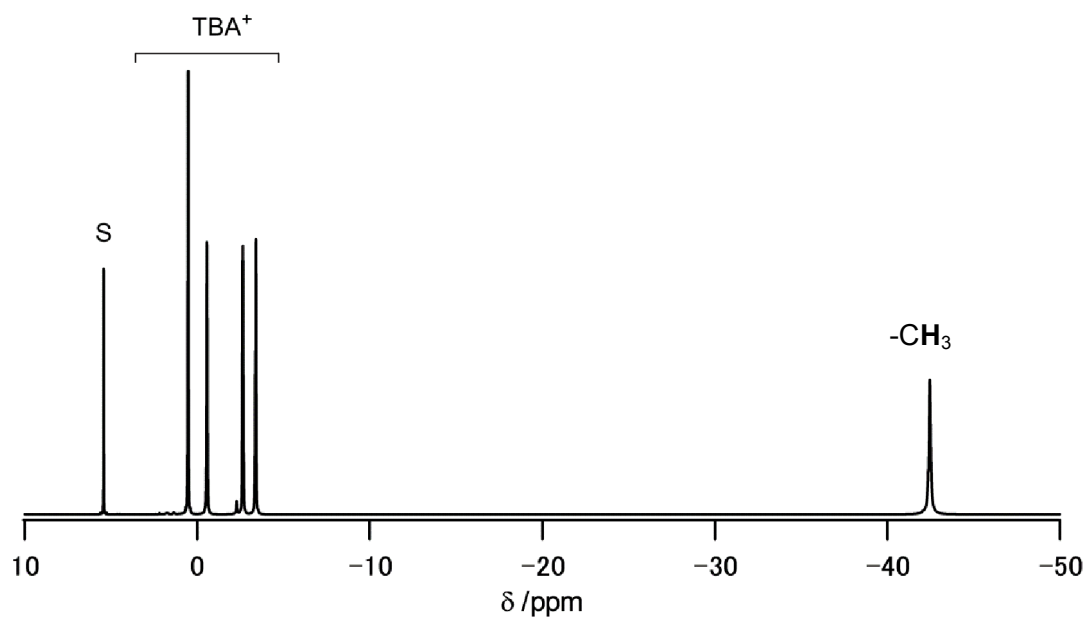

Fig. S6  $^1\text{H}$  NMR Spectrum of **1** in  $\text{CD}_2\text{Cl}_2$  at  $25^\circ\text{C}$ .

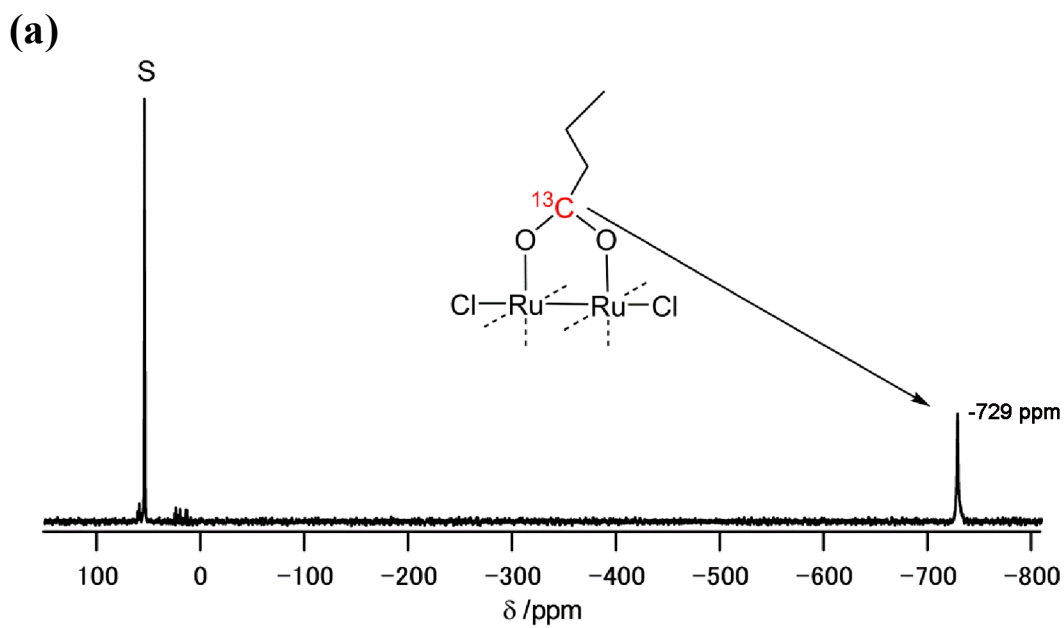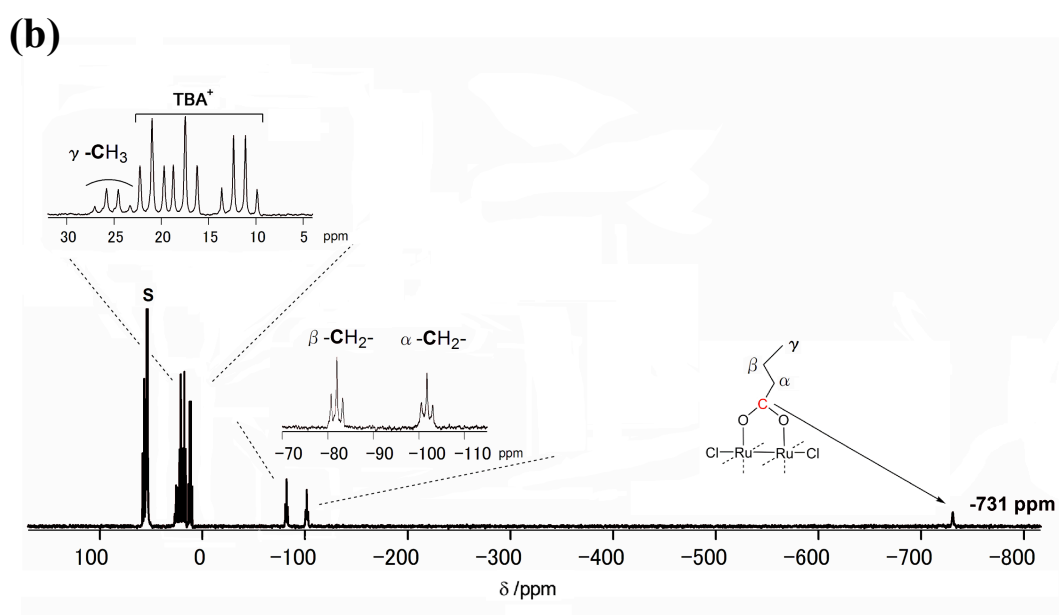

Fig. S7.  $^{13}\text{C}$  NMR Spectrum of  $[\text{Ru}_2\{\text{O}_2^{13}\text{C}(\text{CH}_2)_2\text{CH}_3\}_4\text{Cl}_2]^-$  [(a) top] and  $[\text{Ru}_2\{\text{O}_2\text{C}(\text{CH}_2)_2\text{CH}_3\}_4\text{Cl}_2]^-$  [(b) bottom], which were measured by adding TBA(Cl) to  $[\text{Ru}_2\{\text{O}_2^{13}\text{C}(\text{CH}_2)_2\text{CH}_3\}_4\text{Cl}]$  or  $[\text{Ru}_2\{\text{O}_2\text{C}(\text{CH}_2)_2\text{CH}_3\}_4\text{Cl}]$  in  $\text{CD}_2\text{Cl}_2$  at  $25^\circ\text{C}$ .

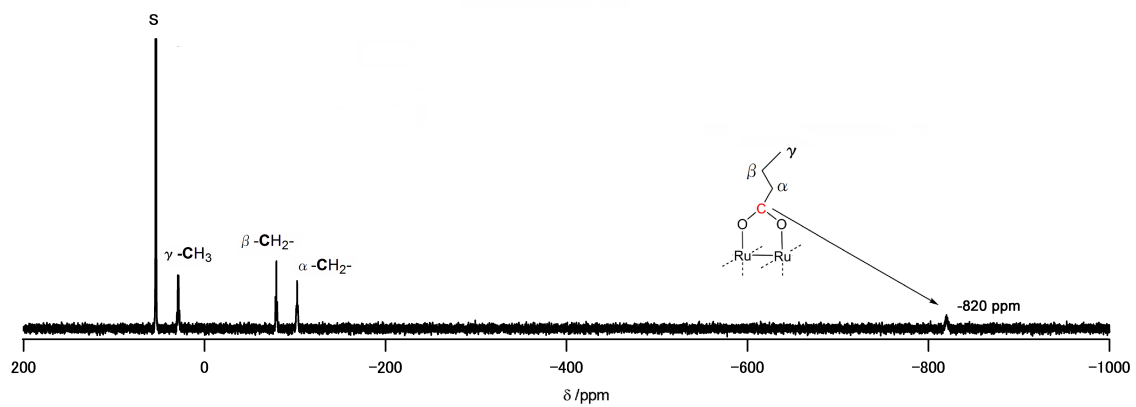

Fig. S8.  $^{13}\text{C}$  NMR Spectrum of  $[\text{Ru}_2\{\text{O}_2\text{C}(\text{CH}_2)_2\text{CH}_3\}_4]\text{BF}_4$ , which was measured in  $\text{CD}_2\text{Cl}_2$  at  $25^\circ\text{C}$ .

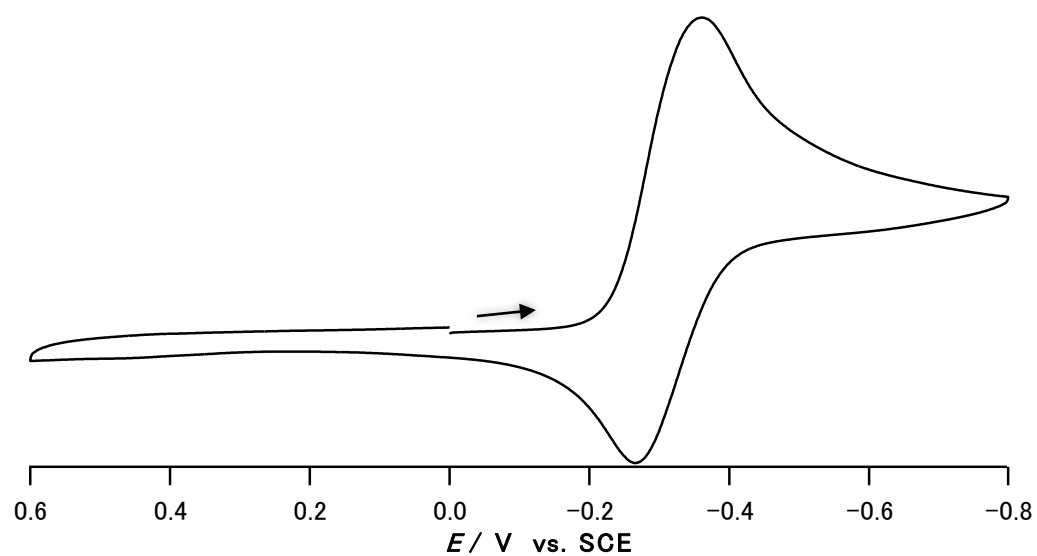

Fig. S9. Cyclic voltammogram(CV) of complex **1** in dichloromethane; scan rate =  $50 \text{ mV s}^{-1}$ ,  $[\text{complex}] = 1 \times 10^{-3} \text{ M}$ ,  $[\text{TBA}(\text{Cl})] = 0.1 \text{ M}$ . Glassy carbon and Pt wire were used as working and counter electrodes, respectively.

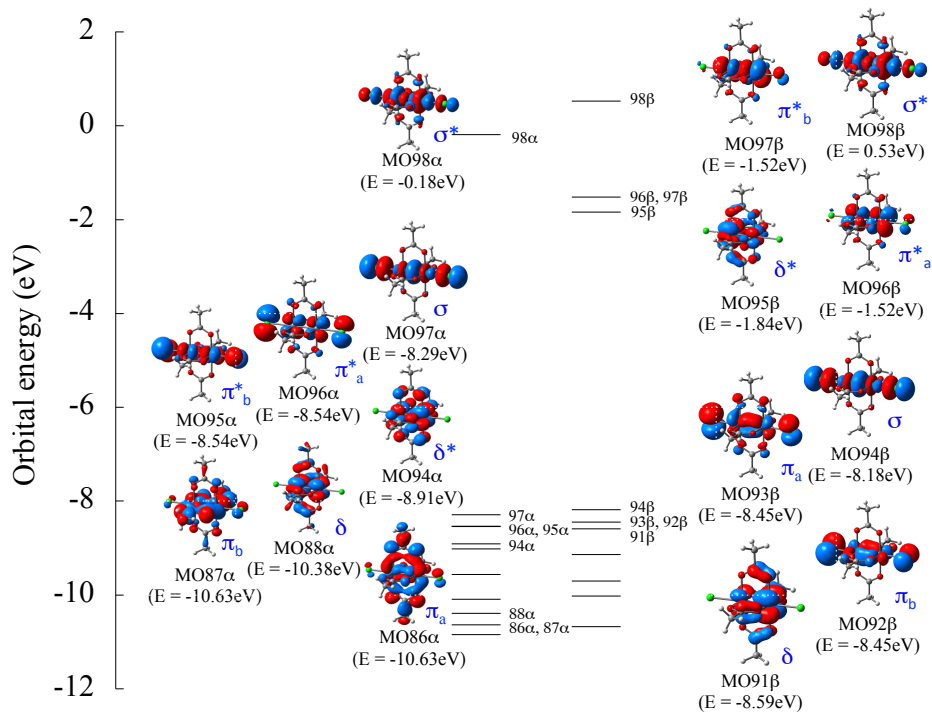

Fig. S10. Selected MOs of  $[\text{Ru}_2(\text{O}_2\text{CCH}_3)_4\text{Cl}_2]^-$ . The bond characters,  $\sigma$  ( $\sigma^*$ ),  $\pi$  ( $\pi^*$ ), and  $\delta$  ( $\delta^*$ ), based on the direct Ru-Ru interaction are described with the blue colored letters.
